# Supplementary material
Source: PubMed Central journal article supplement (PMC5710179)
Supplement: jamaneurol-74-1123-s001.pdf [file jamaneurol-74-1123-s001.pdf]

## Supplementary Online Content

Pathmanaban ON, Sadler KV, Kamaly-Asl ID, et al. Association of genetic predisposition with solitary schwannoma or meningioma in children and young adults. *JAMA Neurol*. Published online July 31, 2017. doi:10.1001/jamaneurol.2017.1406

**eTable 1.** NF2 Patients Diagnosed <25 With an Apparently Isolated Meningioma or Non-Vestibular Schwannoma and Subsequent Tumour Development

**eTable 2.** Characteristics of NF2 Patients Diagnosed <25 With an Apparently Isolated Vestibular Schwannoma and Subsequent Tumour Development

This supplementary material has been provided by the authors to give readers additional information about their work.

**eTable 1.** NF2 Patients Diagnosed <25 With an Apparently Isolated Meningioma or Non-Vestibular Schwannoma and Subsequent Tumour Development

| Case | Presenting tumour | Age at Meningioma (years) | Age at cutaneous schwannoma (years) | Age at spinal schwannoma (years) | Age at VS (years) | First tumour to VS (years) | Mosaic  | NF2 diagnosed before mutation testing |
|------|-------------------|---------------------------|-------------------------------------|----------------------------------|-------------------|----------------------------|---------|---------------------------------------|
| 1    | Meningioma        | 1                         | NA                                  | 16                               | 15                | 14                         | No      | Yes                                   |
| 2    | Meningioma        | 2                         | NA                                  | 10                               | 7                 | 5                          | Yes     | Yes                                   |
| 3    | Meningioma        | 2                         | 3                                   | NA                               | NA                | NA                         | Unknown | Yes                                   |
| 4    | Meningioma        | 2                         | 3                                   | NA                               | NA                | NA                         | No      | No                                    |
| 5    | Meningioma        | 3                         | 4                                   | 9                                | 8                 | 5                          | No      | No                                    |
| 6    | Meningioma        | 3                         | 34                                  | 36                               | 23                | 20                         | No      | Yes                                   |
| 7    | Meningioma        | 3                         | NA                                  | Unknown                          | NA                | NA                         | Yes     | No                                    |
| 8    | Meningioma        | 4                         | 24                                  | 22                               | 16                | 12                         | No      | Yes                                   |
| 9    | Meningioma        | 4                         | NA                                  | NA                               | NA                | NA                         | No      | No                                    |
| 10   | Meningioma        | 5                         | 6                                   | 6                                | NA                | NA                         | No      | No                                    |
| 11   | Meningioma        | 7                         | NA                                  | NA                               | NA                | NA                         | No      | No                                    |
| 12   | Meningioma        | 8                         | NA                                  | NA                               | NA                | NA                         | No      | No                                    |
| 13   | Meningioma        | 9                         | NA                                  | 10                               | NA                | NA                         | No      | No                                    |
| 14   | Meningioma        | 9                         | NA                                  | 10                               | NA                | NA                         | No      | No                                    |
| 15   | Meningioma        | 9                         | NA                                  | NA                               | NA                | NA                         | No      | Yes                                   |
| 16   | Meningioma        | 9                         | NA                                  | NA                               | NA                | NA                         | No      | No                                    |
| 17   | Meningioma        | 9                         | NA                                  | NA                               | NA                | NA                         | No      | No                                    |
| 18   | Meningioma        | 10                        | 11                                  | 14                               | 11                | 1                          | No      | Yes                                   |
| 19   | Meningioma        | 10                        | NA                                  | 15                               | 17                | 7                          | No      | Yes                                   |
| 20   | Meningioma        | 10                        | 18                                  | 15                               | 18                | 8                          | No      | Yes                                   |
| 21   | Meningioma        | 10                        | NA                                  | 24                               | 19                | 9                          | No      | Yes                                   |
| 22   | Meningioma        | 10                        | 30                                  | 26                               | 21                | 11                         | Yes     | Yes                                   |
| 23   | Meningioma        | 11                        | NA                                  | NA                               | 18                | 7                          | No      | No                                    |
| 24   | Meningioma        | 13                        | 14                                  | 14                               | 14                | 1                          | No      | Yes                                   |
| 25   | Meningioma        | 13                        | 23                                  | 23                               | 15                | 2                          | No      | Yes                                   |
| 26   | Meningioma        | 15                        | 27                                  | 15                               | 24                | 9                          | Unknown | Yes                                   |
| 27   | Meningioma        | 16                        | NA                                  | NA                               | 17                | 1                          | No      | Yes                                   |

|    |                       |    |                                                          |    |    |    |          |     |
|----|-----------------------|----|----------------------------------------------------------|----|----|----|----------|-----|
| 28 | Meningioma            | 18 | 24                                                       | 26 | 20 | 2  | Yes      | Yes |
| 29 | Meningioma            | 21 | NA                                                       | 23 | 23 | 2  | No       | Yes |
| 30 | Spinal schwannoma     | 21 | NA                                                       | 6  | 13 | 7  | No       | Yes |
| 31 | Spinal schwannoma     | NA | NA                                                       | 6  | NA | NA | No       | No  |
| 32 | Spinal schwannoma     | NA | NA                                                       | 6  | NA | NA | NA       | No  |
| 33 | Spinal schwannoma     | 9  | 7 (only found on closer examination after gene testing)  | 7  | NA | NA | No       | No  |
| 34 | Spinal schwannoma     | NA | NA                                                       | 9  | 10 | 9  | No       | Yes |
| 35 | Spinal schwannoma     | 13 | 16                                                       | 10 | 13 | 3  | No       | Yes |
| 36 | Spinal schwannoma     | NA | 15                                                       | 10 | NA | 16 | Yes      | Yes |
| 37 | Spinal schwannoma     | 16 | NA                                                       | 12 | 15 | 3  | Unknown  | Yes |
| 38 | Spinal schwannoma     | 15 | 12 (only found on closer examination after gene testing) | 12 | 15 | 3  | No       | Yes |
| 39 | Spinal schwannoma     | 21 | 21                                                       | 12 | 18 | 6  | No       | Yes |
| 40 | Spinal schwannoma     | NA | 20                                                       | 13 | 16 | 3  | No       | Yes |
| 41 | Spinal schwannoma     | 16 | NA                                                       | 15 | 16 | 1  | No       | Yes |
| 42 | Spinal schwannoma     | NA | 16                                                       | 16 | 17 | 1  | Yes      | No  |
| 43 | Spinal schwannoma     | 27 | 23                                                       | 19 | 23 | 4  | Unknown* | Yes |
| 44 | Spinal schwannoma     | 29 | NA                                                       | 20 | 30 | 9  | Yes      | Yes |
| 45 | Spinal schwannoma     | NA | NA                                                       | 20 | 45 | 25 | No       | Yes |
| 46 | Cutaneous schwannomas | 24 | 2                                                        | 10 | 13 | 11 | No       | Yes |
| 47 | Cutaneous schwannomas | 33 | 3                                                        | 19 | 16 | 13 | No       | Yes |
| 48 | Cutaneous schwannomas | NA | 5                                                        | 10 | 10 | 5  | No       | Yes |
| 49 | Cutaneous schwannomas | 16 | 5                                                        | 16 | 15 | 10 | No       | Yes |
| 50 | Cutaneous schwannomas | 17 | 5                                                        | 17 | 17 | 12 | No       | Yes |
| 51 | Cutaneous schwannomas | NA | 6                                                        | 13 | 8  | 2  | No       | Yes |
| 52 | Cutaneous schwannomas | 19 | 7                                                        | 23 | 20 | 13 | No       | Yes |
| 53 | Cutaneous schwannomas | NA | 7                                                        | 23 | 23 | 16 | No       | Yes |

|    |                       |    |    |    |    |   |     |     |
|----|-----------------------|----|----|----|----|---|-----|-----|
| 54 | Cutaneous schwannomas | 11 | 8  | 11 | 11 | 3 | No  | No  |
| 55 | Cutaneous schwannomas | 15 | 8  | NA | 17 | 9 | No  | Yes |
| 56 | Cutaneous schwannomas | NA | 9  | NA | 13 | 4 | No  | Yes |
| 57 | Cutaneous schwannomas | NA | 9  | NA | 15 | 6 | No  | Yes |
| 58 | Cutaneous schwannomas | NA | 10 | 18 | 18 | 8 | Yes | Yes |
| 59 | Cutaneous schwannomas | 17 | 11 | 17 | 17 | 6 | No  | Yes |
| 60 | Cutaneous schwannomas | NA | 12 | NA | 13 | 1 | No  | Yes |
| 61 | Cutaneous schwannomas | NA | 12 | 15 | 13 | 1 | No  | Yes |
| 62 | Cutaneous schwannomas | NA | 12 | 15 | 16 | 4 | No  | Yes |
| 63 | Cutaneous schwannomas | 17 | 12 | 17 | 17 | 5 | No  | Yes |
| 64 | Cutaneous schwannomas | 16 | 13 | NA | 15 | 2 | No  | Yes |
| 65 | Cutaneous schwannomas | 20 | 13 | 17 | 17 | 4 | Yes | Yes |
| 66 | Cutaneous schwannomas | 21 | 16 | 17 | 17 | 1 | No  | Yes |
| 67 | Cutaneous schwannomas | 19 | 17 | 19 | 18 | 1 | No  | Yes |
| 68 | Cutaneous schwannomas | 19 | 17 | 19 | 19 | 2 | Yes | Yes |
| 69 | Cutaneous schwannomas | NA | 18 | 25 | 23 | 5 | No  | Yes |

<sup>a</sup>NF2 mutation not found in tumour

**eTable 2.** Characteristics of NF2 Patients Diagnosed <25 With an Apparently Isolated Vestibular Schwannoma and Subsequent Tumour Development

| Case | Sex | Age at UVS (years) | Years since UVS | VS status at last follow up | Spinal schwannoma | Age spinal (years) | Cranial meningioma | Age at meningioma (years) | Cutaneous schwannoma | Age at cutaneous schwannoma (years) | Delay to second tumour (years) | NF2 diagnosed before mutation testing | NF2 mutation type   | Mosaic  |
|------|-----|--------------------|-----------------|-----------------------------|-------------------|--------------------|--------------------|---------------------------|----------------------|-------------------------------------|--------------------------------|---------------------------------------|---------------------|---------|
| 70   | F   | 1                  | 1               | Bilateral                   | No                | NA                 | No                 | NA                        | No                   | NA                                  | 1                              | No                                    | Nonsense            | Yes     |
| 71   | M   | 1                  | 2               | Unilateral                  | No                | NA                 | No                 | NA                        | No                   | NA                                  | NA                             | No                                    | Nonsense            | No      |
| 72   | M   | 10                 | 19              | Unilateral                  | Yes               | 20                 | No                 | NA                        | Yes                  | 24                                  | 10                             | Yes                                   | Frameshift deletion | Yes     |
| 73   | F   | 13                 | 13              | Bilateral                   | Yes               | 26                 | Yes                | 24                        | No                   | NA                                  | 11                             | Yes                                   | Frameshift deletion | No      |
| 74   | F   | 13                 | 1               | Unilateral                  | No                | NA                 | No                 | NA                        | No                   | NA                                  | NA                             | No                                    | Large deletion      | No      |
| 75   | F   | 16                 | 9               | Unilateral                  | Yes               | 21                 | Yes                | 21                        | Yes                  | 21                                  | 5                              | Yes                                   | Frameshift deletion | Yes     |
| 76   | M   | 16                 | 1               | Unilateral                  | No                | NA                 | No                 | NA                        | No                   | NA                                  | NA                             | No                                    | Splice Donor Site   | No      |
| 77   | M   | 18                 | 2               | Unilateral                  | Yes               | 19                 | No                 | NA                        | No                   | NA                                  | 1                              | Yes                                   | Nonsense            | Yes     |
| 78   | M   | 18                 | 7               | Bilateral                   | Yes               | 25                 | No                 | NA                        | Yes                  | 25                                  | 7                              | Yes                                   | Frameshift deletion | No      |
| 79   | F   | 18                 | 6               | Unilateral                  | No                | NA                 | No                 | NA                        | No                   | NA                                  | NA                             | No                                    | Large deletion      | Yes     |
| 80   | M   | 18                 | 9               | Unilateral                  | No                | NA                 | Yes                | 27                        | No                   | NA                                  | NA                             | No                                    | Splice Donor Site   | Yes     |
| 81   | F   | 19                 | 1               | Unilateral                  | Yes               | unknown            | No                 | NA                        | Yes                  | 20                                  | 1                              | Yes                                   | Not identified      | Unknown |
| 82   | F   | 19                 | 1               | Unilateral                  | No                | NA                 | No                 | NA                        | No                   | NA                                  | NA                             | No                                    | Large deletion      | No      |
| 83   | M   | 20                 | 1               | Unilateral                  | Yes               | 21                 | No                 | NA                        | Yes                  | 21                                  | 1                              | Yes                                   | Large deletion      | Yes     |
| 84   | F   | 20                 | 1               | Bilateral                   | No                | NA                 | No                 | NA                        | No                   | NA                                  | 1                              | Yes                                   | Nonsense            | No      |
| 85   | F   | 20                 | 10              | Bilateral                   | Yes               | 30                 | No                 | NA                        | No                   | NA                                  | 10                             | No                                    | Not identified      | No      |

|    |   |    |    |            |     |    |     |    |    |    |    |     |                |     |
|----|---|----|----|------------|-----|----|-----|----|----|----|----|-----|----------------|-----|
| 86 | F | 21 | 2  | Bilateral  | No  | NA | No  | NA | No | NA | 2  | Yes | Nonsense       | Yes |
| 87 | M | 21 | 4  | Bilateral  | No  | NA | No  | NA | No | NA | 4  | Yes | Large deletion | Yes |
| 88 | F | 22 | 20 | Unilateral | Yes | 32 | Yes | 32 | No | NA | 10 | Yes | Not identified | No  |

NB: When an *NF2* mutation was not identified in lymphocyte DNA the diagnosis was made based on clinical criteria.
